# Supplementary material for: Standardised Ileal Amino Acid Digestibility in Field Pea Seeds of Two Cultivars Differing in Flower Colour for Broiler Chickens: Effects of Bird Age and Microbial Protease
Source: PubMed Central journal article supplement (PMC7697707; doi:10.3390/ani10112099), 2020-11-12
Supplement: animals-10-02099-s001.pdf [file animals-10-02099-s001.pdf]

**Supplementary Table S1.** Raw data for apparent ileal digestibility (AID) of amino acids in the white-flowered pea cv. Tarchalska.

| Amino Acid | Treatment Combinations: Age of Broilers (14 or 28 d) by Protease Addition ('-' without or '+' with enzyme) |          |          |          |
|------------|------------------------------------------------------------------------------------------------------------|----------|----------|----------|
|            | 14 d -                                                                                                     | 14 d +   | 28 d -   | 28 d +   |
| Asp        | 0.831370                                                                                                   | 0.832509 | 0.836655 | 0.841264 |
|            | 0.836087                                                                                                   | 0.850148 | 0.847080 | 0.853434 |
|            | 0.835107                                                                                                   | 0.825366 | 0.849988 | 0.829341 |
|            | 0.837367                                                                                                   | 0.825038 | 0.842328 | 0.848030 |
|            | 0.828359                                                                                                   | 0.854281 | 0.847921 | 0.836036 |
|            | 0.814395                                                                                                   | 0.845669 | 0.829989 | 0.849107 |
| Thr        | 0.744985                                                                                                   | 0.709605 | 0.741036 | 0.776466 |
|            | 0.753203                                                                                                   | 0.756586 | 0.728665 | 0.824281 |
|            | 0.719728                                                                                                   | 0.732086 | 0.769844 | 0.766148 |
|            | 0.729716                                                                                                   | 0.727925 | 0.772362 | 0.770893 |
|            | 0.707889                                                                                                   | 0.774555 | 0.786814 | 0.783051 |
|            | 0.727037                                                                                                   | 0.771618 | 0.774228 | 0.797154 |
| Ser        | 0.776159                                                                                                   | 0.746393 | 0.789280 | 0.804225 |
|            | 0.785603                                                                                                   | 0.789622 | 0.765917 | 0.787855 |
|            | 0.759725                                                                                                   | 0.778805 | 0.799021 | 0.780443 |
|            | 0.807110                                                                                                   | 0.770112 | 0.796082 | 0.794798 |
|            | 0.745660                                                                                                   | 0.811404 | 0.804796 | 0.806443 |
|            | 0.756998                                                                                                   | 0.801546 | 0.805303 | 0.785222 |
| Glu        | 0.877789                                                                                                   | 0.858994 | 0.884196 | 0.875530 |
|            | 0.881328                                                                                                   | 0.893958 | 0.853322 | 0.885067 |
|            | 0.868632                                                                                                   | 0.875837 | 0.877383 | 0.870111 |
|            | 0.900951                                                                                                   | 0.875155 | 0.869107 | 0.884474 |
|            | 0.883680                                                                                                   | 0.896655 | 0.873189 | 0.885601 |
|            | 0.887464                                                                                                   | 0.888683 | 0.859190 | 0.881297 |
| Pro        | 0.773598                                                                                                   | 0.765898 | 0.811601 | 0.783885 |
|            | 0.772007                                                                                                   | 0.804663 | 0.788978 | 0.801061 |
|            | 0.754100                                                                                                   | 0.794693 | 0.814889 | 0.763236 |
|            | 0.815588                                                                                                   | 0.795096 | 0.791431 | 0.829096 |
|            | 0.747626                                                                                                   | 0.829960 | 0.794065 | 0.813538 |
|            | 0.761153                                                                                                   | 0.826683 | 0.768406 | 0.824252 |
| Gly        | 0.792795                                                                                                   | 0.762756 | 0.796421 | 0.811024 |
|            | 0.793802                                                                                                   | 0.809693 | 0.781199 | 0.848702 |
|            | 0.774180                                                                                                   | 0.787765 | 0.813240 | 0.845356 |
|            | 0.823182                                                                                                   | 0.784363 | 0.807130 | 0.809868 |
|            | 0.755812                                                                                                   | 0.821199 | 0.812821 | 0.824700 |
|            | 0.767504                                                                                                   | 0.817339 | 0.798374 | 0.830185 |
| Ala        | 0.801542                                                                                                   | 0.770245 | 0.808476 | 0.822853 |
|            | 0.803457                                                                                                   | 0.819531 | 0.784842 | 0.802415 |
|            | 0.782656                                                                                                   | 0.796940 | 0.824367 | 0.807265 |
|            | 0.831280                                                                                                   | 0.797372 | 0.811938 | 0.817832 |
|            | 0.761286                                                                                                   | 0.832822 | 0.827636 | 0.833231 |
|            | 0.775554                                                                                                   | 0.830054 | 0.807990 | 0.796374 |
| Val        | 0.791768                                                                                                   | 0.763921 | 0.798567 | 0.798476 |
|            | 0.794020                                                                                                   | 0.810964 | 0.770562 | 0.798728 |
|            | 0.776318                                                                                                   | 0.788047 | 0.805342 | 0.783579 |
|            | 0.821236                                                                                                   | 0.783703 | 0.797654 | 0.806434 |
|            | 0.754533                                                                                                   | 0.821963 | 0.805123 | 0.815841 |
|            | 0.768816                                                                                                   | 0.816932 | 0.785862 | 0.831190 |
| Ile        | 0.758572                                                                                                   | 0.741102 | 0.782699 | 0.783181 |
|            | 0.754425                                                                                                   | 0.792950 | 0.754958 | 0.777435 |
|            | 0.762854                                                                                                   | 0.772511 | 0.797925 | 0.770500 |
|            | 0.766547                                                                                                   | 0.767813 | 0.781225 | 0.794609 |

|     |          |          |          |          |
|-----|----------|----------|----------|----------|
|     | 0.749327 | 0.808768 | 0.794313 | 0.750352 |
|     | 0.770980 | 0.803977 | 0.773849 | 0.766277 |
| Leu | 0.803907 | 0.811890 | 0.810095 | 0.803179 |
|     | 0.811610 | 0.824517 | 0.778598 | 0.830813 |
|     | 0.792310 | 0.838705 | 0.820314 | 0.789100 |
|     | 0.804436 | 0.798214 | 0.800929 | 0.812456 |
|     | 0.790749 | 0.833998 | 0.817078 | 0.803587 |
|     | 0.803175 | 0.860120 | 0.795098 | 0.819437 |
| Tyr | 0.805904 | 0.778161 | 0.812157 | 0.821271 |
|     | 0.800629 | 0.826131 | 0.808942 | 0.845498 |
|     | 0.800253 | 0.788896 | 0.843663 | 0.845873 |
|     | 0.826394 | 0.794960 | 0.814708 | 0.862658 |
|     | 0.807918 | 0.839159 | 0.819590 | 0.813974 |
|     | 0.833934 | 0.831207 | 0.786195 | 0.807026 |
| Phe | 0.826690 | 0.789461 | 0.832719 | 0.809244 |
|     | 0.832523 | 0.834339 | 0.799875 | 0.837830 |
|     | 0.816083 | 0.818778 | 0.834062 | 0.834343 |
|     | 0.846062 | 0.815983 | 0.814238 | 0.858027 |
|     | 0.834428 | 0.848532 | 0.819882 | 0.889953 |
|     | 0.795213 | 0.842500 | 0.784144 | 0.806432 |
| His | 0.839487 | 0.800536 | 0.839375 | 0.826537 |
|     | 0.843983 | 0.844560 | 0.817060 | 0.841343 |
|     | 0.827403 | 0.828961 | 0.851810 | 0.836718 |
|     | 0.855719 | 0.829822 | 0.825598 | 0.857511 |
|     | 0.806213 | 0.860944 | 0.836389 | 0.813108 |
|     | 0.816544 | 0.856030 | 0.814556 | 0.819139 |
| Lys | 0.836854 | 0.841785 | 0.843586 | 0.868270 |
|     | 0.839679 | 0.884887 | 0.850662 | 0.895552 |
|     | 0.859054 | 0.870380 | 0.850550 | 0.867191 |
|     | 0.861074 | 0.869349 | 0.866659 | 0.876749 |
|     | 0.854276 | 0.891390 | 0.846816 | 0.905217 |
|     | 0.835367 | 0.884354 | 0.859866 | 0.886426 |
| Arg | 0.848348 | 0.883543 | 0.864049 | 0.881019 |
|     | 0.846647 | 0.913642 | 0.862378 | 0.893490 |
|     | 0.840646 | 0.897324 | 0.866621 | 0.864348 |
|     | 0.854973 | 0.896759 | 0.859135 | 0.881648 |
|     | 0.848862 | 0.916588 | 0.860850 | 0.880680 |
|     | 0.861921 | 0.909396 | 0.847767 | 0.881376 |
| Cys | 0.715249 | 0.747537 | 0.773506 | 0.789170 |
|     | 0.729605 | 0.806551 | 0.695307 | 0.778702 |
|     | 0.764463 | 0.718331 | 0.711639 | 0.806696 |
|     | 0.769103 | 0.760878 | 0.737223 | 0.718266 |
|     | 0.754303 | 0.764216 | 0.729623 | 0.775434 |
|     | 0.732566 | 0.733903 | 0.707284 | 0.745533 |
| Met | 0.785576 | 0.829278 | 0.864981 | 0.883675 |
|     | 0.782837 | 0.867572 | 0.792733 | 0.871930 |
|     | 0.844603 | 0.753343 | 0.843805 | 0.893143 |
|     | 0.849846 | 0.877508 | 0.816204 | 0.773836 |
|     | 0.878662 | 0.818830 | 0.837432 | 0.865336 |
|     | 0.822363 | 0.816382 | 0.820397 | 0.789013 |

**Supplementary Table S2.** Raw data for apparent ileal digestibility (AID) of amino acids in the coloured-flowered pea cv. Milwa.

| Amino Acid | Treatment Combinations: Age of Broilers (14 or 28 d) by Protease Addition ('-' without or '+' with enzyme) |          |          |          |
|------------|------------------------------------------------------------------------------------------------------------|----------|----------|----------|
|            | 14 d -                                                                                                     | 14 d +   | 28 d -   | 28 d +   |
| Asp        | 0.691321                                                                                                   | 0.874390 | 0.852558 | 0.887679 |
|            | 0.808066                                                                                                   | 0.819144 | 0.829904 | 0.865535 |
|            | 0.759682                                                                                                   | 0.784275 | 0.834932 | 0.872783 |
|            | 0.855606                                                                                                   | 0.809411 | 0.812276 | 0.836460 |
|            | 0.829153                                                                                                   | 0.830032 | 0.810269 | 0.892579 |
|            | 0.786632                                                                                                   | 0.823045 | 0.832707 | 0.841766 |
| Thr        | 0.630093                                                                                                   | 0.847432 | 0.795991 | 0.861312 |
|            | 0.760117                                                                                                   | 0.752218 | 0.767351 | 0.831220 |
|            | 0.681811                                                                                                   | 0.724205 | 0.786775 | 0.847137 |
|            | 0.808918                                                                                                   | 0.753549 | 0.755603 | 0.770393 |
|            | 0.770510                                                                                                   | 0.803365 | 0.751855 | 0.852906 |
|            | 0.735361                                                                                                   | 0.797393 | 0.770806 | 0.790714 |
| Ser        | 0.675825                                                                                                   | 0.839875 | 0.817266 | 0.875524 |
|            | 0.778043                                                                                                   | 0.790561 | 0.788574 | 0.828455 |
|            | 0.743544                                                                                                   | 0.762891 | 0.790450 | 0.855773 |
|            | 0.822717                                                                                                   | 0.781681 | 0.771207 | 0.771930 |
|            | 0.806133                                                                                                   | 0.798903 | 0.765275 | 0.852479 |
|            | 0.758732                                                                                                   | 0.783638 | 0.785649 | 0.790258 |
| Glu        | 0.716197                                                                                                   | 0.888522 | 0.884367 | 0.918489 |
|            | 0.829232                                                                                                   | 0.843313 | 0.858461 | 0.887725 |
|            | 0.789736                                                                                                   | 0.801442 | 0.866066 | 0.904610 |
|            | 0.869672                                                                                                   | 0.811291 | 0.836816 | 0.862918 |
|            | 0.855407                                                                                                   | 0.842371 | 0.838281 | 0.914435 |
|            | 0.804664                                                                                                   | 0.835226 | 0.852071 | 0.863728 |
| Pro        | 0.611612                                                                                                   | 0.849062 | 0.811397 | 0.867293 |
|            | 0.759162                                                                                                   | 0.757583 | 0.772024 | 0.838742 |
|            | 0.686326                                                                                                   | 0.727392 | 0.802673 | 0.856670 |
|            | 0.812332                                                                                                   | 0.757626 | 0.780081 | 0.790168 |
|            | 0.765057                                                                                                   | 0.798608 | 0.775754 | 0.864670 |
|            | 0.733930                                                                                                   | 0.791103 | 0.786393 | 0.803865 |
| Gly        | 0.655661                                                                                                   | 0.849928 | 0.821694 | 0.859746 |
|            | 0.778285                                                                                                   | 0.781771 | 0.789031 | 0.832436 |
|            | 0.718420                                                                                                   | 0.756709 | 0.804374 | 0.841458 |
|            | 0.823459                                                                                                   | 0.772033 | 0.778111 | 0.785893 |
|            | 0.794570                                                                                                   | 0.808658 | 0.775092 | 0.855611 |
|            | 0.762229                                                                                                   | 0.802270 | 0.767982 | 0.794867 |
| Ala        | 0.664676                                                                                                   | 0.852379 | 0.839133 | 0.871315 |
|            | 0.780520                                                                                                   | 0.790205 | 0.792371 | 0.842058 |
|            | 0.730825                                                                                                   | 0.764807 | 0.812199 | 0.851343 |
|            | 0.829322                                                                                                   | 0.772296 | 0.778373 | 0.792201 |
|            | 0.807586                                                                                                   | 0.812595 | 0.778342 | 0.866455 |
|            | 0.765359                                                                                                   | 0.802065 | 0.779518 | 0.801250 |
| Val        | 0.641926                                                                                                   | 0.837159 | 0.813494 | 0.851544 |
|            | 0.762794                                                                                                   | 0.771599 | 0.764634 | 0.822465 |
|            | 0.707315                                                                                                   | 0.739486 | 0.781776 | 0.836980 |
|            | 0.811721                                                                                                   | 0.753772 | 0.752055 | 0.776369 |
|            | 0.787918                                                                                                   | 0.792219 | 0.751213 | 0.854045 |
|            | 0.744010                                                                                                   | 0.779789 | 0.762853 | 0.789872 |
| Ile        | 0.606007                                                                                                   | 0.824916 | 0.805213 | 0.842702 |
|            | 0.739775                                                                                                   | 0.755616 | 0.753466 | 0.813412 |
|            | 0.677454                                                                                                   | 0.721196 | 0.769789 | 0.825872 |
|            | 0.796606                                                                                                   | 0.733640 | 0.740400 | 0.760125 |

|     |          |          |          |          |
|-----|----------|----------|----------|----------|
|     | 0.768396 | 0.776425 | 0.738760 | 0.842364 |
|     | 0.718950 | 0.762371 | 0.747785 | 0.778371 |
| Leu | 0.624706 | 0.839649 | 0.820025 | 0.860719 |
|     | 0.753774 | 0.777189 | 0.773792 | 0.828824 |
|     | 0.705876 | 0.740554 | 0.789761 | 0.842517 |
|     | 0.813284 | 0.750263 | 0.755489 | 0.784535 |
|     | 0.793872 | 0.788441 | 0.755239 | 0.862025 |
|     | 0.738631 | 0.779320 | 0.768007 | 0.794015 |
| Tyr | 0.730447 | 0.859765 | 0.842653 | 0.869423 |
|     | 0.823373 | 0.804702 | 0.794742 | 0.855598 |
|     | 0.786026 | 0.781583 | 0.795311 | 0.866223 |
|     | 0.843750 | 0.773391 | 0.794222 | 0.823468 |
|     | 0.834443 | 0.820364 | 0.796950 | 0.874816 |
|     | 0.812065 | 0.810483 | 0.830259 | 0.832206 |
| Phe | 0.687022 | 0.854891 | 0.862990 | 0.872704 |
|     | 0.803459 | 0.810329 | 0.811781 | 0.850489 |
|     | 0.755701 | 0.778223 | 0.821145 | 0.857273 |
|     | 0.840859 | 0.788485 | 0.796434 | 0.818385 |
|     | 0.820709 | 0.815819 | 0.794791 | 0.877421 |
|     | 0.777568 | 0.805510 | 0.809531 | 0.826190 |
| His | 0.737743 | 0.859820 | 0.888860 | 0.873763 |
|     | 0.812774 | 0.817831 | 0.803494 | 0.851965 |
|     | 0.781481 | 0.801458 | 0.821893 | 0.860266 |
|     | 0.850258 | 0.809756 | 0.788177 | 0.814763 |
|     | 0.823870 | 0.831317 | 0.788874 | 0.870034 |
|     | 0.803134 | 0.814898 | 0.800028 | 0.832481 |
| Lys | 0.700589 | 0.897004 | 0.899735 | 0.913751 |
|     | 0.830629 | 0.849849 | 0.850112 | 0.891381 |
|     | 0.791621 | 0.804334 | 0.866491 | 0.901248 |
|     | 0.875689 | 0.810426 | 0.829988 | 0.853993 |
|     | 0.857043 | 0.848063 | 0.830216 | 0.912213 |
|     | 0.801966 | 0.839000 | 0.838260 | 0.840450 |
| Arg | 0.745421 | 0.917758 | 0.914206 | 0.935067 |
|     | 0.860566 | 0.883331 | 0.888205 | 0.910814 |
|     | 0.832059 | 0.829532 | 0.888856 | 0.924750 |
|     | 0.899823 | 0.835265 | 0.870358 | 0.899399 |
|     | 0.895186 | 0.879137 | 0.875494 | 0.938086 |
|     | 0.842071 | 0.865034 | 0.884068 | 0.901815 |
| Cys | 0.636091 | 0.571787 | 0.647932 | 0.688930 |
|     | 0.649560 | 0.706885 | 0.643202 | 0.688889 |
|     | 0.624596 | 0.648297 | 0.638822 | 0.653309 |
|     | 0.666550 | 0.759150 | 0.639262 | 0.696228 |
|     | 0.657180 | 0.673226 | 0.637833 | 0.655987 |
|     | 0.658385 | 0.670891 | 0.642955 | 0.632603 |
| Met | 0.695344 | 0.662563 | 0.671778 | 0.797128 |
|     | 0.717345 | 0.770522 | 0.732002 | 0.788087 |
|     | 0.760415 | 0.765425 | 0.800729 | 0.803952 |
|     | 0.772377 | 0.730462 | 0.778072 | 0.788377 |
|     | 0.593203 | 0.789627 | 0.646104 | 0.776693 |
|     | 0.779493 | 0.784516 | 0.781153 | 0.788678 |
